# Supplementary material for: Cryogenically preserved RBCs support gametocytogenesis of Plasmodium falciparum in vitro and gametogenesis in mosquitoes
Source: Springer Nature journal article supplement (doi:10.1186/s12936-018-2612-y), 2018-12-01

# Additional file 1

## Fresh RBCs, 3-4 days/<1 week post-collection

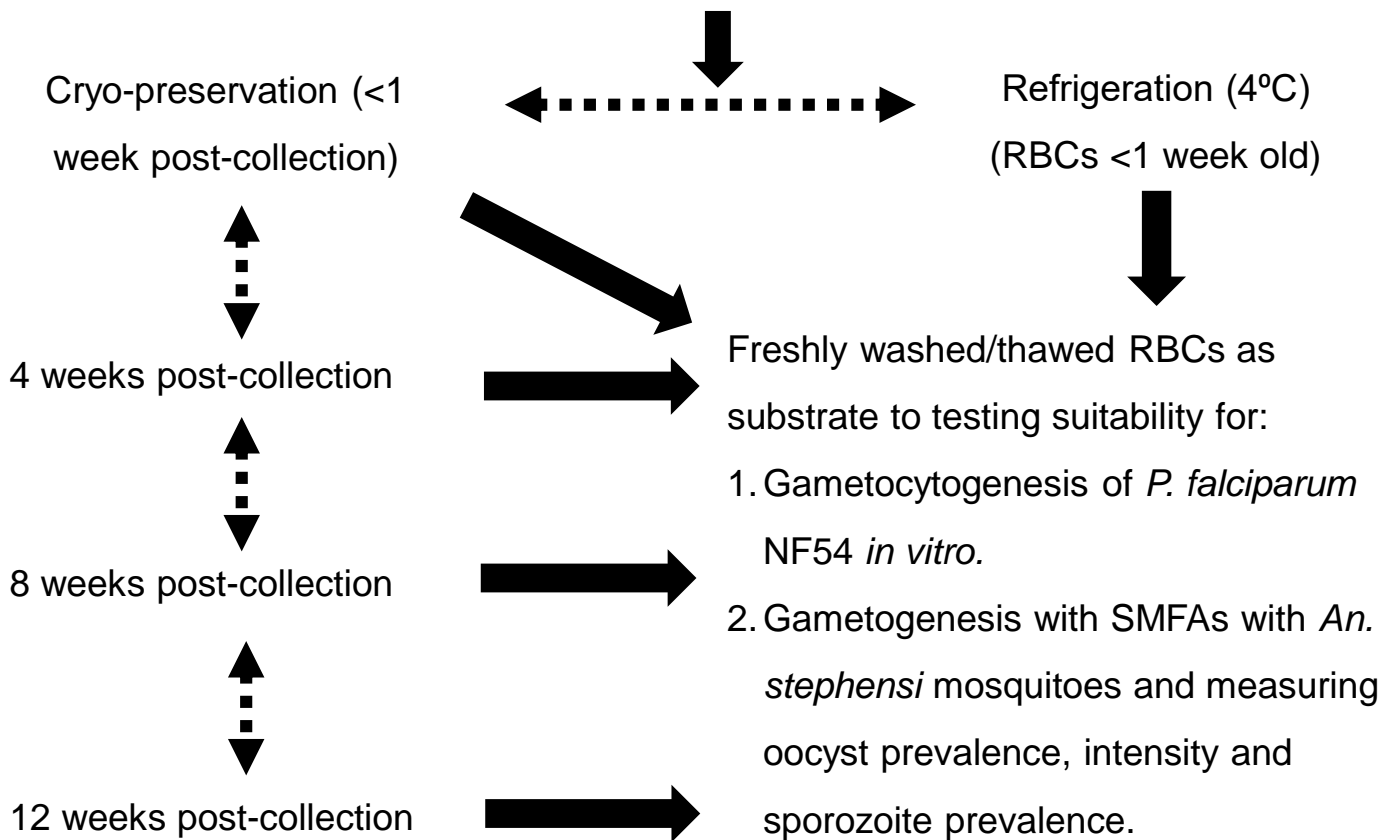

Supplement: MOESM1 [file 16320240]
