# Supplementary material for: Cryogenically preserved RBCs support gametocytogenesis of Plasmodium falciparum in vitro and gametogenesis in mosquitoes
Source: Springer Nature journal article supplement (doi:10.1186/s12936-018-2612-y), 2018-12-01
Supplement: MOESM2 [file 16320240]

# Additional file 2

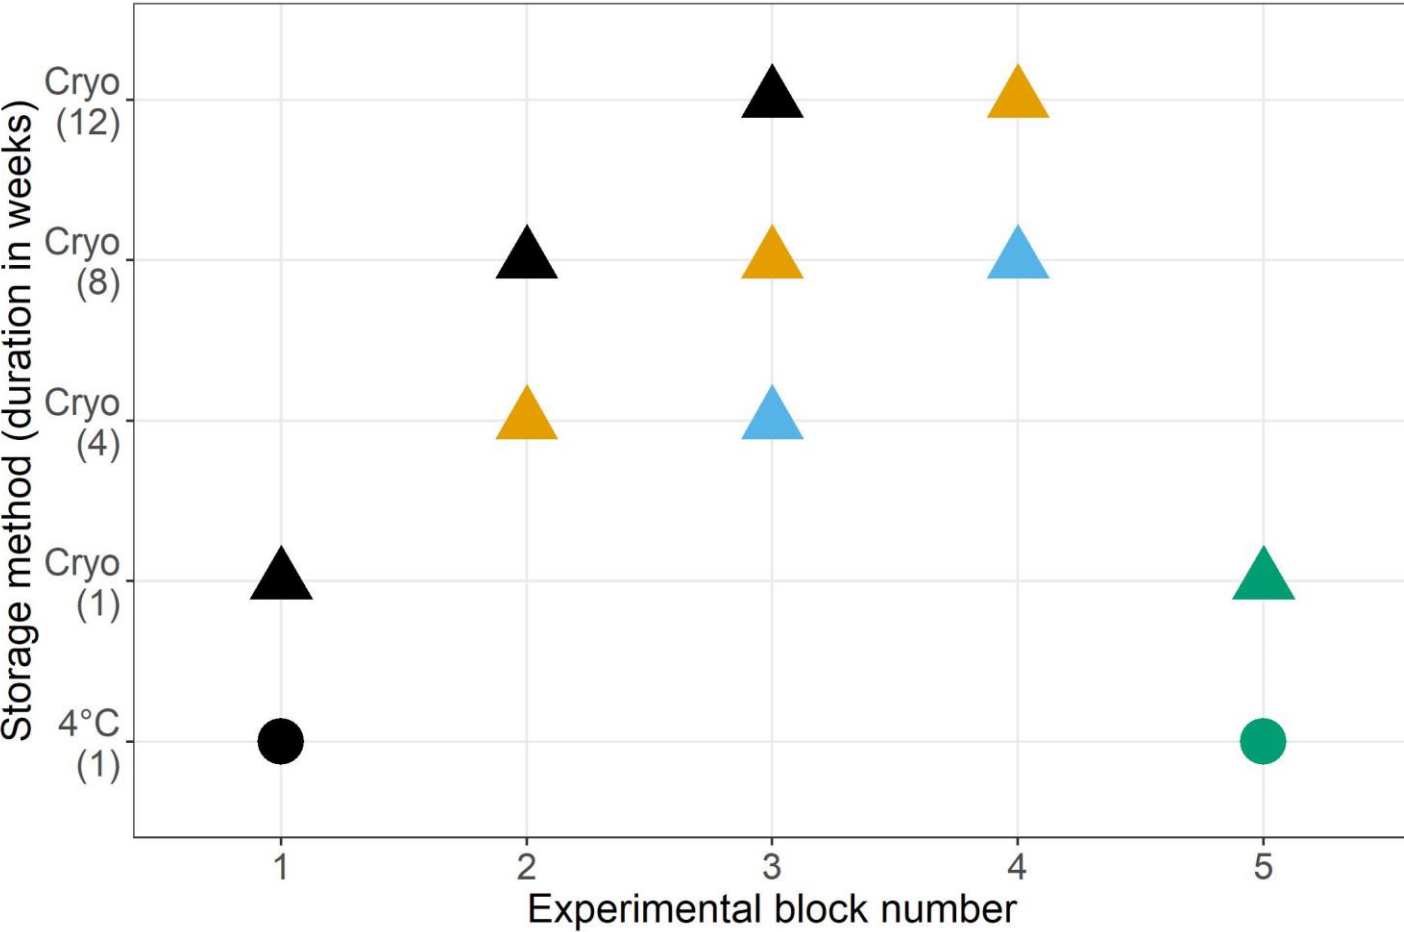

RBC donor no. ● 1 ● 2 ● 3 ● 4

RBC storage method ● 4°C ▲ Cryo
