# Supplementary material for: Cryogenically preserved RBCs support gametocytogenesis of Plasmodium falciparum in vitro and gametogenesis in mosquitoes
Source: Springer Nature journal article supplement (doi:10.1186/s12936-018-2612-y), 2018-12-01

**Additional file 3a**

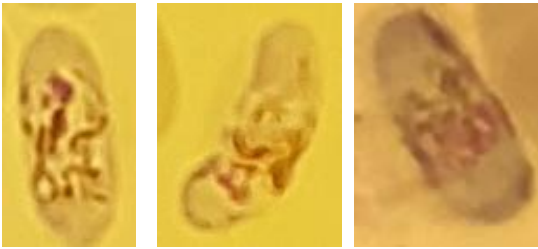

**Additional file 3b**

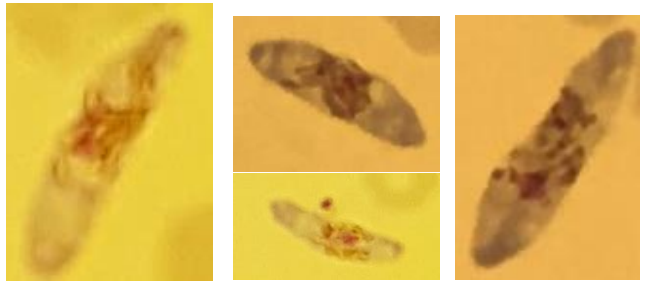

**Additional file 3c**

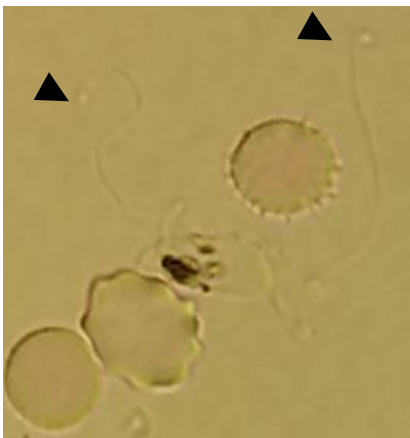

**Additional file 3d**

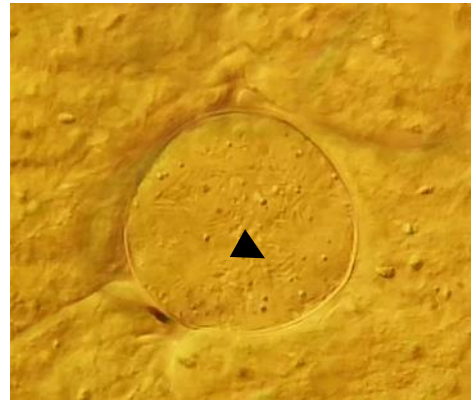

**Additional file 3e**

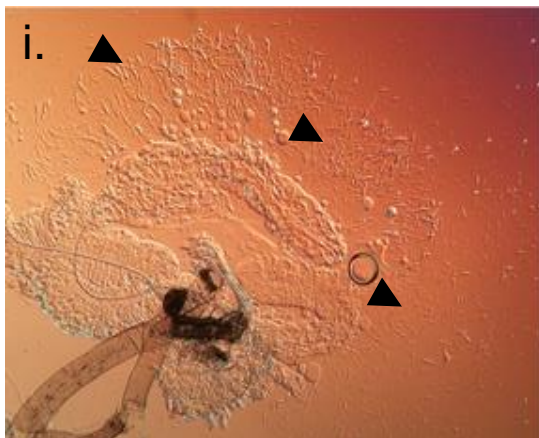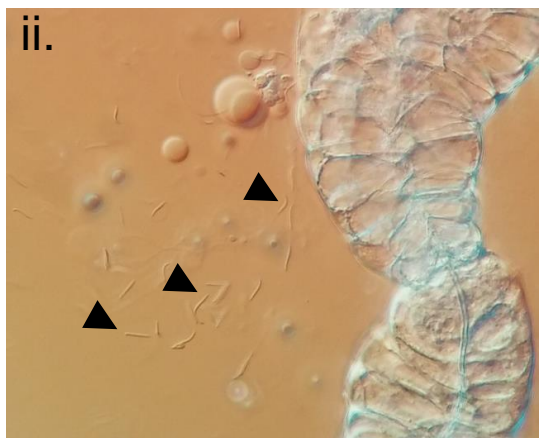

Supplement: MOESM3 [file 16320240]
