# Supplementary material for: Cryogenically preserved RBCs support gametocytogenesis of Plasmodium falciparum in vitro and gametogenesis in mosquitoes
Source: Springer Nature journal article supplement (doi:10.1186/s12936-018-2612-y), 2018-12-01

### Additional file 4a

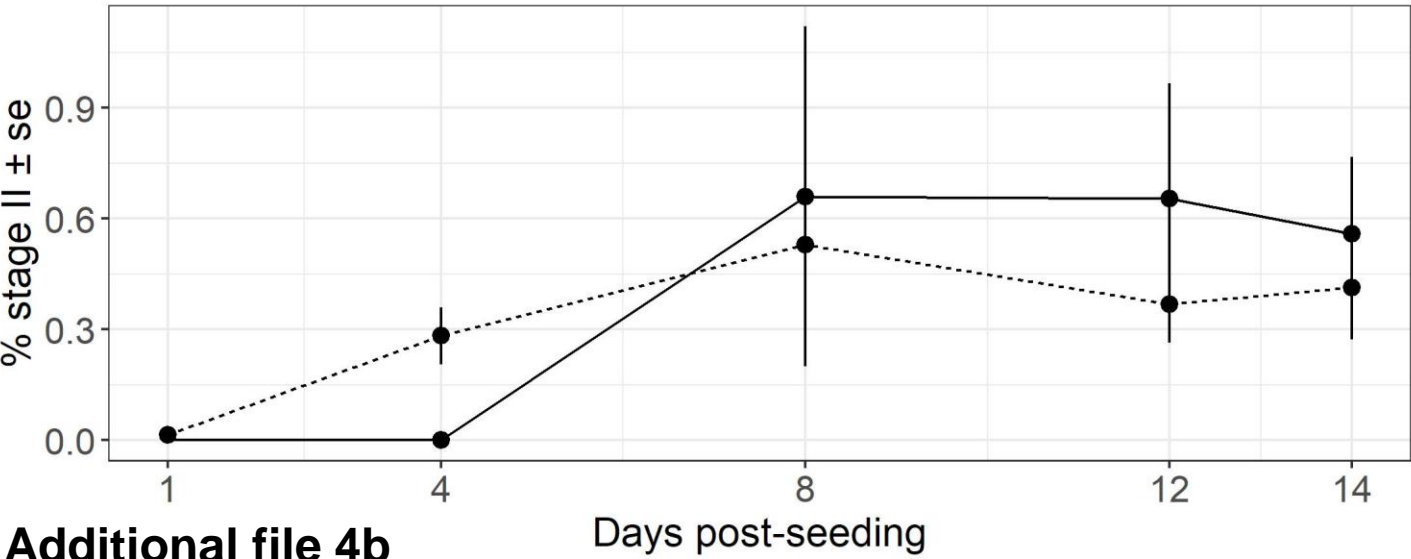

### Additional file 4b

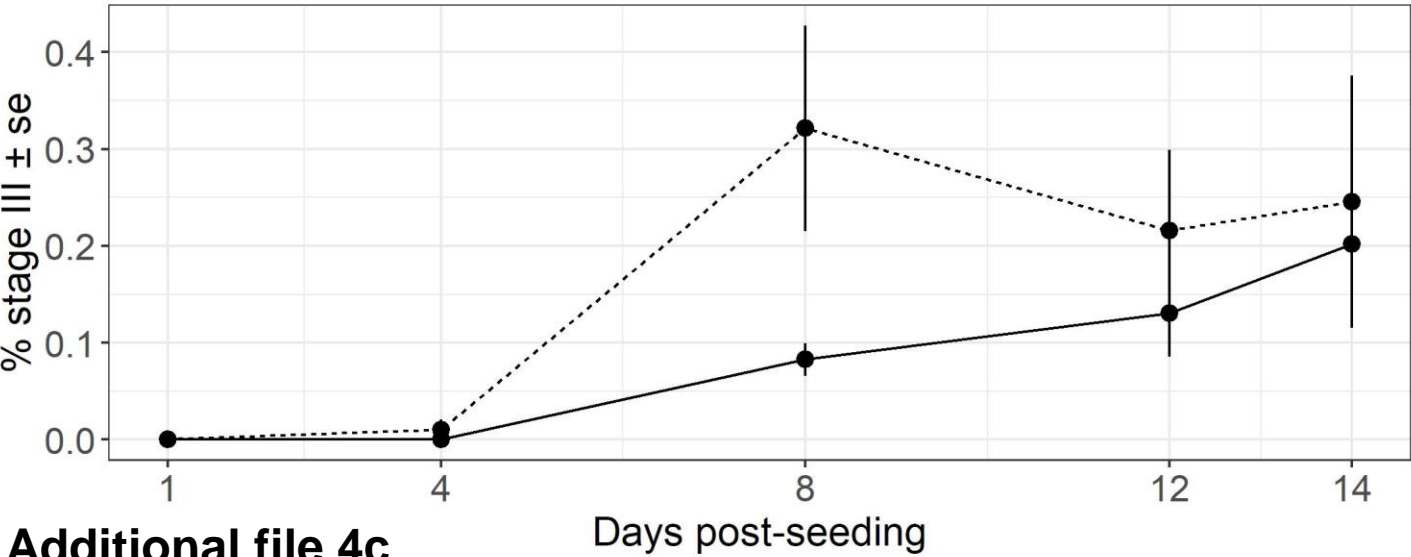

### Additional file 4c

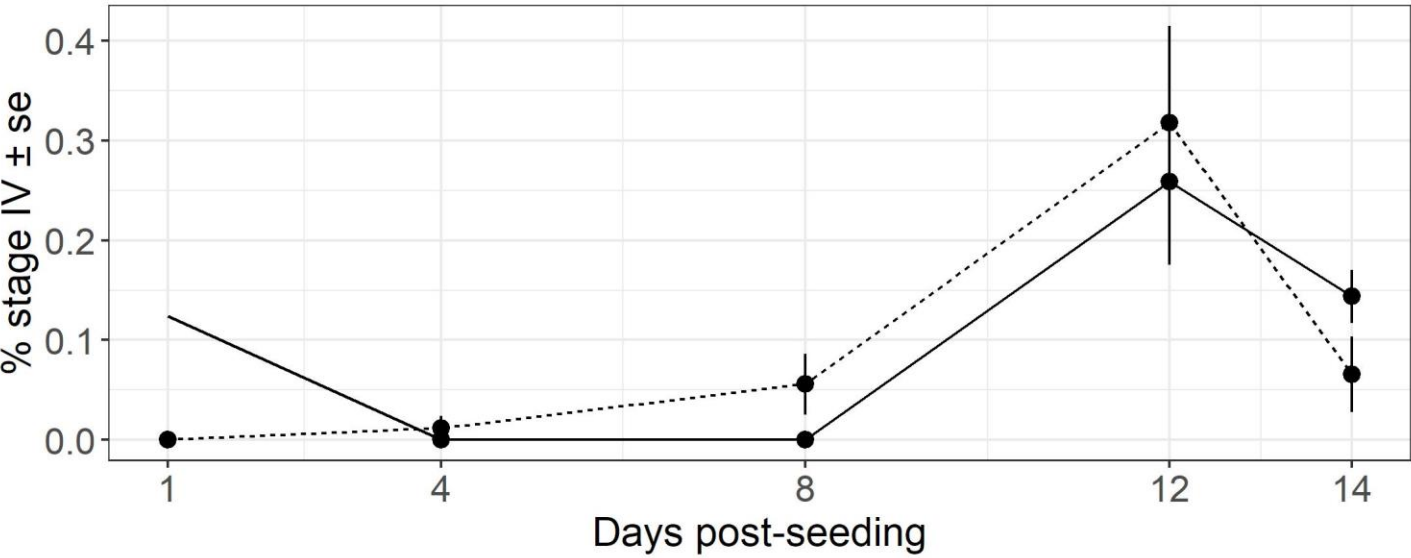

Supplement: MOESM4 [file 16320240]
