# Supplementary material for: Cryogenically preserved RBCs support gametocytogenesis of Plasmodium falciparum in vitro and gametogenesis in mosquitoes
Source: Springer Nature journal article supplement (doi:10.1186/s12936-018-2612-y), 2018-12-01

**Additional file 5a**

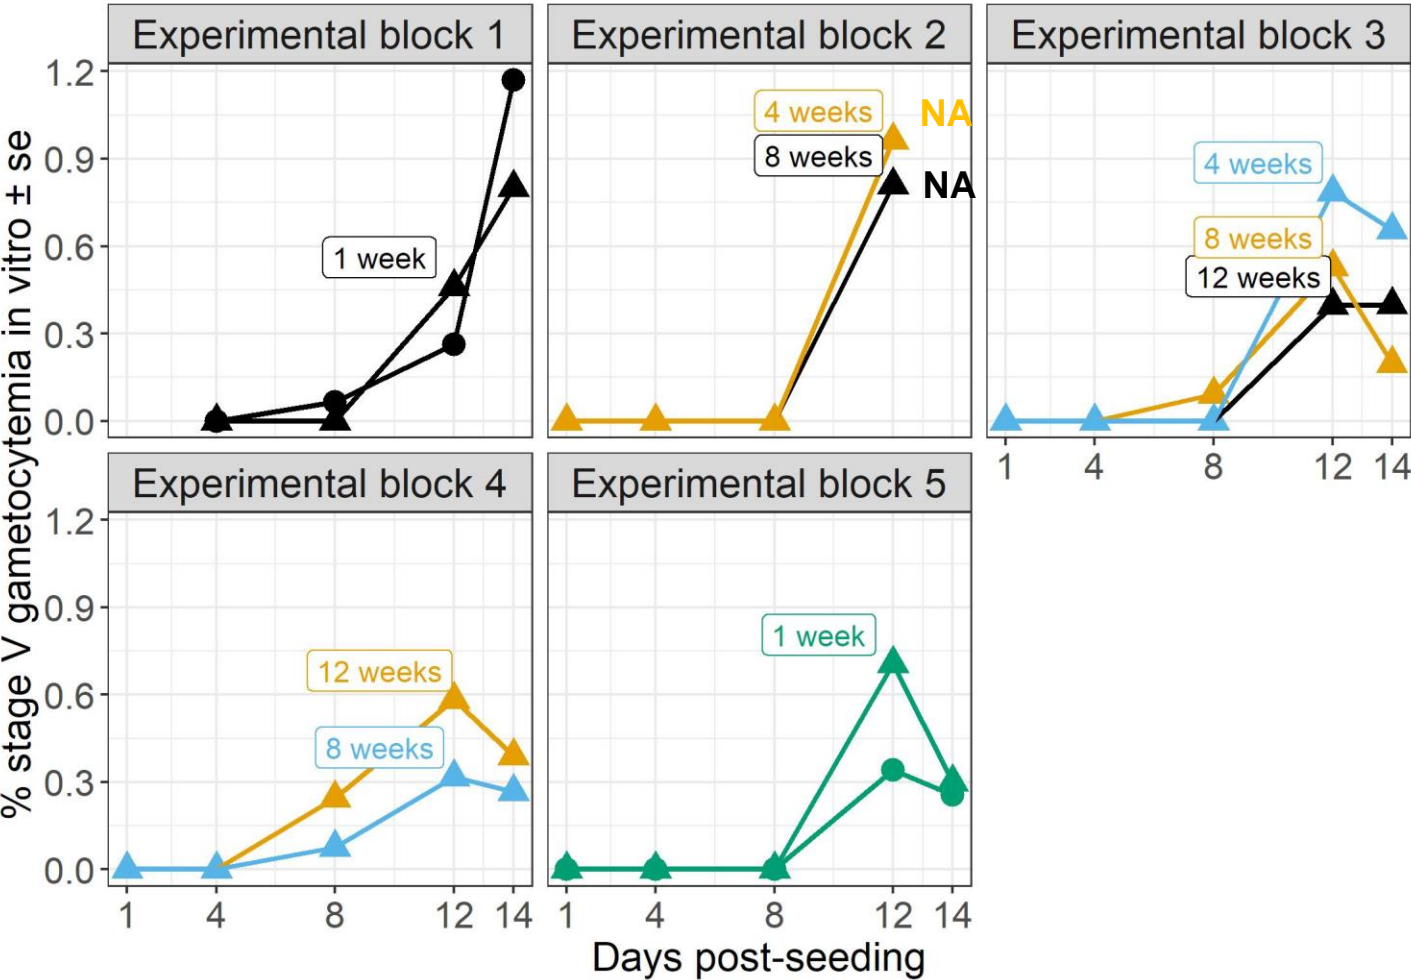

RBC donor no. ● 1 ● 2 ● 3 ● 4 RBC storage method ● 4°C ▲ Cryo

**Additional file 5b**

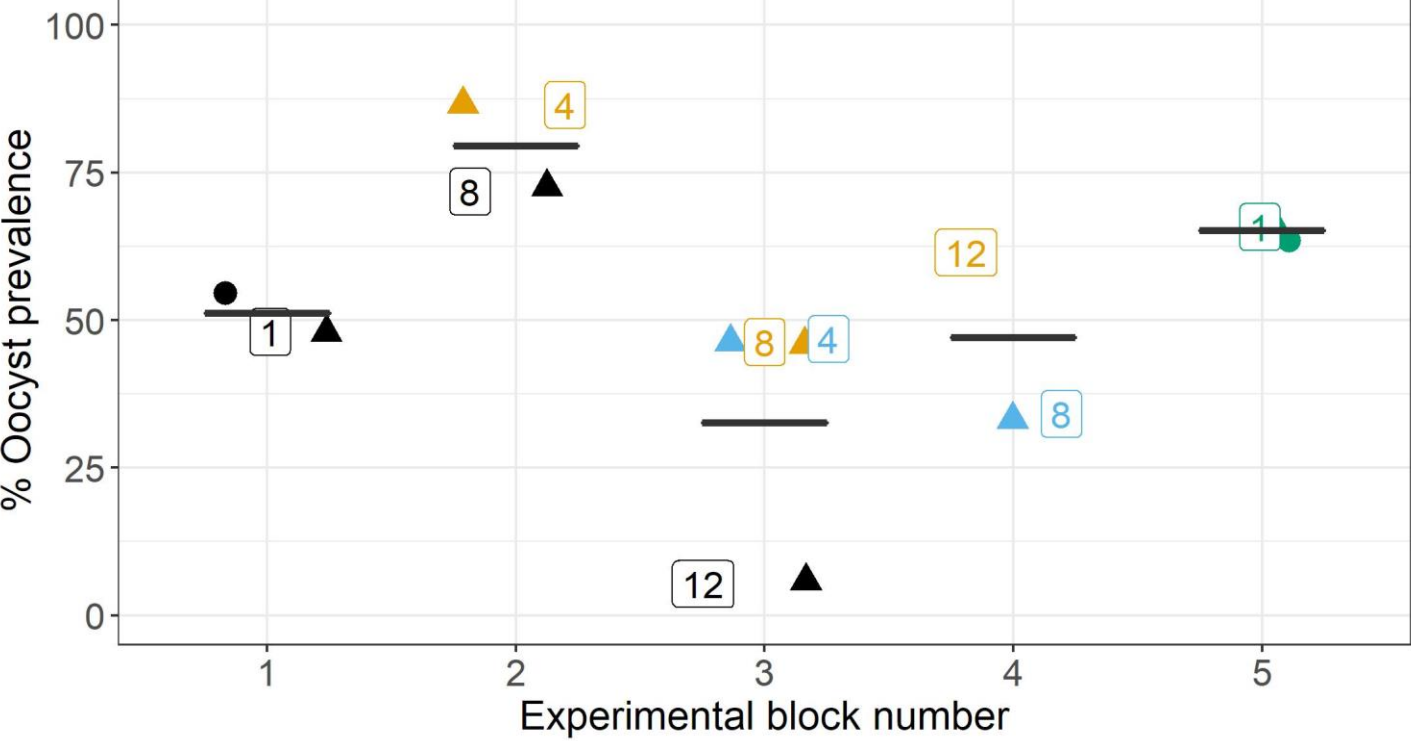

Supplement: MOESM5 [file 16320240]
